# Supplementary material for: Impaired skeletal muscle mitochondrial pyruvate uptake rewires glucose metabolism to drive whole-body leanness
Source: eLife. 2019 Jul 18;8:e45873. doi: 10.7554/eLife.45873 (PMC6684275; doi:10.7554/eLife.45873)
Supplement: Supplementary file 1. [file elife-45873-supp1.xlsx]

## Sheet: Sheet1
	(Relative to WT Non-contracted (NC))						Anova			Post-hoc pairwise t-test (Holm-Sidak)
	WT (NC)	KO (NC)	KO/WT (NC)	WT (C)	KO (C)	KO/WT (C)	Condition	Genotype	Interaction	KOCon vs KONon-Con	KOCon vs WTCon	KOCon vs WTNon-Con	KONon-Con vs WTCon	KONon-Con vs WTNon-Con	WTCon vs WTNon-Con
Alanine	1.00±0.02	0.92±0.08	0.92	1.31±0.04	1.27±0.08	0.97	3.09786e-05	0.366932	0.717227	0.00274324	0.754765	0.0197921	0.00127957	0.754765	0.0108449
Lactate	1.00±0.04	1.03±0.12	1.03	2.18±0.18	2.18±0.26	1.00	5.9708e-06	0.925291	0.941098	0.00153442	1	0.00160573	0.00160573	1	0.00160573
Uracil	1.00±0.12	1.16±0.33	1.16	1.44±0.12	1.72±0.71	1.20	0.290261	0.627936	0.892868	1	1	1	1	1	1
Proline	1.00±0.11	0.86±0.09	0.86	0.97±0.09	0.92±0.10	0.95	0.859384	0.359569	0.656615	1	1	1	1	1	1
Valine	1.00±0.13	1.00±0.13	1.00	0.97±0.10	1.20±0.18	1.24	0.510888	0.38999	0.412673	1	1	1	1	1	1
Succinate	1.00±0.07	1.85±0.55	1.85	4.03±0.74	3.37±1.09	0.84	0.0133403	0.932678	0.359648	0.511355	0.943419	0.24024	0.301822	0.943419	0.129472
Threonine	1.00±0.11	0.76±0.06	0.76	1.09±0.12	0.76±0.11	0.69	0.707825	0.0128739	0.63651	1	0.180202	0.500053	0.201053	0.500053	1
Taurine	1.00±0.03	0.94±0.06	0.94	1.01±0.03	0.92±0.08	0.92	0.932017	0.244753	0.860433	1	1	1	1	1	1
Leucine	1.00±0.06	1.24±0.14	1.24	1.30±0.14	1.61±0.16	1.24	0.028714	0.0561783	0.795762	0.324598	0.458966	0.0368541	0.762792	0.479646	0.458966
Asparagine	1.00±0.08	0.83±0.06	0.83	1.20±0.10	0.91±0.11	0.76	0.158501	0.020313	0.526379	1	0.16428	1	0.0640892	0.698223	0.645887
Ornithine	1.00±0.06	0.72±0.04	0.72	1.01±0.10	0.79±0.07	0.78	0.571778	0.00246455	0.673933	0.990836	0.14049	0.149579	0.0597679	0.075758	0.990836
Aspartate	1.00±0.06	0.93±0.13	0.93	1.29±0.12	2.80±0.49	2.17	0.000869962	0.012217	0.0097515	0.000564037	0.00316212	0.00115092	1	1	1
Malate	1.00±0.03	0.80±0.04	0.80	1.27±0.04	0.79±0.08	0.62	0.0424443	5.66844e-06	0.0271548	0.96196	3.38939e-05	0.0627615	5.09993e-05	0.0627615	0.0182783
Glutamine	1.00±0.09	0.77±0.10	0.77	0.82±0.10	0.47±0.06	0.57	0.0103508	0.00249976	0.463643	0.0674667	0.0316018	0.0019708	0.674029	0.266986	0.365247
Lysine	1.00±0.29	1.12±0.10	1.12	0.84±0.21	1.25±0.13	1.48	0.919758	0.169971	0.453082	1	0.810198	1	1	1	1
Glutamate	1.00±0.05	0.87±0.08	0.87	0.76±0.06	0.42±0.08	0.55	8.81184e-05	0.00260643	0.163553	0.000869473	0.00881768	8.96613e-05	0.443973	0.443973	0.105203
Methionine	1.00±0.08	0.99±0.14	0.99	1.10±0.11	1.30±0.27	1.17	0.27827	0.596207	0.609263	1	1	1	1	1	1
Histidine	1.00±0.09	0.90±0.04	0.90	1.03±0.09	0.87±0.10	0.84	0.972967	0.136615	0.702188	1	1	1	1	1	1
Phenylalanine	1.00±0.14	1.54±0.37	1.54	0.54±0.24	1.69±0.39	3.12	0.901503	0.0340517	0.196134	1	0.110687	0.628375	0.558001	1	1
Arginine	1.00±0.27	1.18±0.18	1.18	0.93±0.25	1.36±0.30	1.47	0.813889	0.234631	0.644733	1	1	1	1	1	1
Citrulline	1.00±0.07	0.66±0.04	0.66	1.01±0.11	0.79±0.08	0.79	0.343139	0.00306244	0.457722	0.48076	0.252649	0.269269	0.0369266	0.0510511	0.93438
Glucose	1.00±0.17	1.80±0.24	1.80	1.21±0.21	2.54±0.48	2.11	0.176327	0.00263753	0.400094	0.375954	0.0297151	0.0177883	0.375954	0.375954	0.655244
Tyrosine	1.00±0.07	0.80±0.09	0.80	0.99±0.09	1.02±0.15	1.02	0.316873	0.483902	0.329978	1	1	1	1	1	1
Mannitol_Sorbitol	1.00±0.05	0.67±0.17	0.67	1.12±0.08	0.55±0.08	0.49	0.915263	0.00042614	0.283443	0.814257	0.0060054	0.0429198	0.0429198	0.164446	0.814257
3PG	1.00±0.10	1.03±0.13	1.03	1.18±0.35	0.97±0.12	0.82	0.80884	0.618662	0.534796	1	1	1	1	1	1
(iso)Citrate	1.00±0.06	0.87±0.11	0.87	0.97±0.10	0.59±0.10	0.60	0.109784	0.011377	0.205742	0.182527	0.0444717	0.0444717	1	1	1
Tryptophan	1.00±0.12	0.79±0.05	0.79	0.86±0.07	0.69±0.10	0.80	0.196163	0.0482544	0.831775	0.887967	0.703165	0.143717	0.887967	0.646888	0.887967
Uridine	1.00±0.13	2.12±1.13	2.12	0.92±0.11	1.25±0.19	1.36	0.390815	0.25193	0.509933	1	1	1	0.969218	1	1
Palmitate	1.00±0.06	0.90±0.06	0.90	0.88±0.05	1.03±0.20	1.17	0.911348	0.795166	0.270466	1	1	1	1	1	1
G6P_F6P	1.00±0.10	1.04±0.18	1.04	0.78±0.18	0.72±0.12	0.92	0.0829234	0.933586	0.741064	0.790894	1	1	1	1	1
Glutathione(red)	1.00±0.28	0.56±0.15	0.56	1.67±0.31	0.92±0.28	0.55	0.0743815	0.0337391	0.559855	0.845947	0.253062	0.845947	0.0483435	0.845947	0.418868
F16BP	1.00±0.22	1.35±0.36	1.35	2.66±1.54	1.35±0.21	0.51	0.35723	0.503864	0.31697	1	1	1	1	1	1
AMP	1.00±0.10	0.99±0.09	0.99	1.51±0.15	1.17±0.21	0.78	0.0554897	0.271204	0.324885	1	0.582706	1	0.201804	1	0.230526
ADP	1.00±0.25	0.99±0.23	0.99	1.94±0.29	1.92±0.35	0.99	0.00408594	0.960579	0.985519	0.162765	1	0.162765	0.162765	1	0.162765
ATP	1.00±0.24	0.77±0.20	0.77	0.95±0.19	0.95±0.26	1.00	0.745141	0.64517	0.630359	1	1	1	1	1	1
Glutathione(ox)	1.00±0.13	0.82±0.08	0.82	0.83±0.12	0.68±0.10	0.82	0.174617	0.13875	0.880316	1	1	0.297586	1	1	1
NAD+	1.00±0.07	0.97±0.07	0.97	0.99±0.05	0.76±0.15	0.77	0.262808	0.200561	0.35957	0.715765	0.715765	0.715765	1	1	1
NADH	1.00±0.30	0.51±0.14	0.51	1.25±0.21	0.31±0.15	0.25	0.815017	0.00192331	0.274371	0.795295	0.0188723	0.117194	0.0779567	0.335581	0.795295
NADP+	1.00±0.09	1.15±0.08	1.15	1.03±0.12	1.16±0.14	1.12	0.877859	0.24945	0.931138	1	1	1	1	1	1
Acetoacetate	1.00±0.12	0.79±0.07	0.79	0.54±0.09	0.89±0.18	1.64	0.186031	0.528346	0.0394487	1	0.305294	1	0.669352	0.784378	0.123395
Serine	1.00±0.11	0.78±0.05	0.78	0.99±0.10	0.80±0.09	0.81	0.960308	0.0403415	0.884975	1	0.7634	0.7634	0.7634	0.7634	1
Glycerate	1.00±0.08	1.23±0.07	1.23	1.13±0.05	1.53±0.50	1.35	0.467693	0.295732	0.779197	1	1	1	1	1	1
ketoleucine	1.00±0.11	0.87±0.42	0.87	0.58±0.03	0.29±0.09	0.50	0.0359434	0.340428	0.732027	0.362516	1	0.228681	1	1	0.874052
Histamine	1.00±0.10	1.00±0.11	1.00	0.84±0.04	0.81±0.12	0.97	0.0925301	0.869967	0.901899	1	1	1	1	1	1
a-KG	1.00±0.15	1.24±0.19	1.24	0.43±0.10	0.59±0.16	1.36	0.000693764	0.216825	0.787269	0.0314929	0.587646	0.240799	0.00716044	0.587646	0.021
Guanine	1.00±0.10	0.96±0.17	0.96	1.06±0.12	1.11±0.21	1.04	0.535033	0.957204	0.807082	1	1	1	1	1	1
Xanthine	1.00±0.42	2.75±0.89	2.75	4.34±0.96	11.20±8.75	2.58	0.291609	0.407271	0.652421	1	1	1	1	1	1
3-sulfinoalanine	1.00±0.21	1.33±0.14	1.33	0.96±0.19	0.82±0.22	0.85	0.136913	0.667847	0.223373	0.376337	1	1	0.853373	0.961808	1
Glycerol-1-phosphate	1.00±0.10	0.71±0.10	0.71	0.95±0.09	0.68±0.20	0.71	0.804326	0.0648198	0.95436	1	0.884574	0.807659	0.884574	0.884574	1
Erythrose 4-phosphate	1.00±0.12	1.03±0.22	1.03	0.68±0.16	0.64±0.13	0.94	0.0445627	0.973059	0.827614	0.596681	1	0.749385	0.749385	1	0.749385
6-phosphogluconate	1.00±0.11	0.72±0.13	0.72	1.88±0.34	0.59±0.10	0.32	0.125547	0.000528286	0.0248388	0.738173	0.000864706	0.513587	0.00443311	0.738173	0.0311115
FAD	1.00±0.02	1.02±0.09	1.02	1.06±0.09	0.90±0.10	0.85	0.69323	0.39011	0.31413	1	1	1	1	1	1
3-Dehydrocarnitine	1.00±0.06	0.99±0.14	0.99	1.14±0.06	0.97±0.17	0.86	0.60403	0.459208	0.548104	1	1	1	1	1	1
Carnitine	1.00±0.05	0.88±0.07	0.88	0.74±0.04	0.74±0.06	1.00	0.00308968	0.35504	0.308315	0.364855	0.992063	0.0306128	0.364855	0.364855	0.0316096
Acetylcarnitine	1.00±0.05	1.05±0.08	1.05	2.43±0.04	1.40±0.16	0.58	1.53115e-07	7.39904e-05	6.83993e-05	0.0550348	3.15017e-06	0.052243	9.41828e-08	0.75058	9.41828e-08
Propionyl-L-carnitine	1.00±0.07	0.97±0.08	0.97	1.97±0.11	2.26±0.37	1.14	3.20913e-05	0.531589	0.457748	0.00162797	0.674718	0.00278807	0.0102301	0.914437	0.0141204
Butyryl-L-carnitine	1.00±0.12	0.82±0.14	0.82	5.55±0.73	3.01±0.62	0.54	4.74384e-06	0.0121984	0.0382604	0.0191437	0.00841472	0.0303701	2.09064e-05	0.819928	5.49443e-05
Octanoyl-L-carnitine	1.00±0.06	1.08±0.25	1.08	3.88±0.53	1.93±0.64	0.50	0.0013464	0.0466929	0.0487066	0.567414	0.0295119	0.567414	0.00307861	0.912496	0.0031016
Decanoyl-L-carnitine	1.00±0.64	0.72±0.27	0.72	19.73±4.87	6.21±1.91	0.32	0.000314509	0.017263	0.027318	0.499624	0.00879183	0.499624	0.000502766	0.945117	0.000824687
Palmitoyl-L-carnitine	1.00±0.25	0.87±0.15	0.87	9.05±2.53	6.60±3.92	0.73	0.0220846	0.597371	0.67746	0.584544	1	0.584544	0.264084	1	0.303462
Pyruvate	1.00±0.20	1.65±0.30	1.65	0.28±0.08	1.93±0.39	6.99	0.53054	0.000548651	0.0994718	0.479861	0.00269014	0.145966	0.0160758	0.322847	0.322847
