# Supplementary material for: Impaired skeletal muscle mitochondrial pyruvate uptake rewires glucose metabolism to drive whole-body leanness
Source: eLife. 2019 Jul 18;8:e45873. doi: 10.7554/eLife.45873 (PMC6684275; doi:10.7554/eLife.45873)
Supplement: Supplementary file 2. — (n = 8, 7 littermates one non-littermate, age = 12 weeks, two tailed t-test) Data are presented as mean ± SEM (*p<0.05, **p<0.01, ***p<0.001). [file elife-45873-supp2.xlsx]

## Sheet: TableS3
		Supplemental file 2 - Isotopologue Distribution (%)
				m0		m+1		m+2		m+3		m+4		m+5		m+6		m+1 to m+n/m0
		Muscle Citrate (6 carbons)	WT	50.40 ± 1.08		25.43 ± 0.32		16.21 ± 0.51		5.75 ± 0.36		1.93 ± 0.18		0.35 ± 0.06				0.99 ± 0.04
			SkmKO	53.92 ± 0.61		24.18 ± 0.29		15.34 ± 0.47		4.87 ± 0.14		1.49 ± 0.14		0.28 ± 0.03				0.85 ± 0.02
			p-value	0.013		0.013		0.23		0.04		0.08		0.48				0.01
		Muscle Fumarate (4 carbons)	WT	66.66 ± 1.97		19.17 ± 0.44		10.72 ± 0.50		2.80 ± 0.20		0.63 ± 0.09						0.50 ± 0.02
			SkmKO	70.21± 0.40		17.71 ± 0.23		9.43 ± 0.15		2.23 ± 0.06		0.39 ± 0.06						0.42 ± 0.008
			p-value	0.013		0.013		0.027		0.02		0.05						0.01
		Muscle Malate (4 carbons)	WT	63.81 ± .91		19.70 ± 0.32		12.03 ± 0.36		3.28 ± 0.16		1.15 ± 0.10						0.56 ± 0.02
			SkmKO	64.68 ± 0.39		19.90 ± 0.13		11.43 ± 0.06		3.10 ± 0.064		1.03 ± 0.04						0.48 ± 0.04
			p-value	0.39		0.59		0.11		0.31		0.56						0.09
		Muscle Lactate (3 carbons)	WT	73.85 ± 1.51		11.97 ± 0.59		5.98 ± 0.41		8.18 ± 0.78								0.35 ± 0.03
			SkmKO	74.03 ± 1.24		11.39 ± 0.36		5.60 ± 0.34		8.96 ± 0.56								0.35 ± 0.02
			p-value	0.92		0.42		0.49		0.43								0.9
		Muscle Alanine (3 carbons)	WT	85.34 ± 1.94		7.86 ± 1.57		3.25 ± 0.20		3.22 ± 0.5								0.16 ± 0.02
			SkmKO	80.48 ± 1.93		11.44 ± 1.96		4.33 ± 0.23		4.82 ± 0.32								0.26 ± 0.03
			p-value	0.09		0.18		0.006		0.019								0.02
		Liver Citrate (6 carbons)	WT	52.54 ± 0.51		23.53 ± 0.20		14.61 ± 0.19		6.27 ± 0.17		2.29 ± 0.06		0.62 ± 0.05		0.11 ± 0.02		0.90± 0.01
			SkmKO	50.99 ± 0.48		23.38 ± 0.16		14.97 ± 0.14		6.96 ± 0.19		2.27 ± 0.09		0.82 ± 0.04		0.13 ± 0.01		0.96 ± 0.01
			p-value	0.045		0.58		0.155		0.02		0.001		0.01		0.7		0.04
		Liver Fumarate (4 carbons)	WT	67.64 ± .60		17.74 ± 0.16		10.32 ± 0.17		3.49 ± 0.28		0.78 ± 0.07						0.47 ± 0.01
			SkmKO	66.03 ± 0.27		17.93 ± 0.11		10.76 ± 0.07		4.17 ± 0.18		1.09 ± 0.04						0.51 ± 0.006
			p-value	0.028		0.37		0.036		0.068		0.003						0.03
		Liver Malate (4 carbons)	WT	62.50 ± .88		19.90 ± 0.39		12.02 ± 0.31		4.11 ± 0.24		1.44 ± 0.10						0.60 ± 0.02
			SkmKO	61.06 ± 0.45		19.73 ± 0.18		12.60 ± 0.15		4.85 ± 0.15		1.73 ± 0.10						0.63 ± 0.01
			p-value	0.17		0.69		0.11		0.02		0.13						0.18
		Liver Lactate (3 carbons)	WT	70.15 ± 0.54		14.74 ± 0.30		8.07 ± 0.24		6.89 ± 0.12								0.39 ± 0.025
			SkmKO	70.41 ± 0.79		13.88 ± 0.32		8.08 ± 0.15		6.84 ± 0.33								0.39 ± 0.024
			p-value	0.21		0.08		0.98		0.9								0.9
		Liver Alanine (3 carbons)	WT	79.84 ± 1.54		12.03 ± 0.86		4.45 ± 0.23		3.28 ± 0.47								0.23 ± 0.020
			SkmKO	82.01 ± 0.54		10.75 ± 0.28		4.14 ± 0.13		3.21 ± 0.24								0.21 ± 0.007
			p-value	0.23		0.2		0.3		0.9								0.4
